# Supplementary material for: Thinned Virtual Array for Cramer Rao Bound Optimization in MIMO Radar
Source: Hindawi journal article supplement (doi:10.1155/2021/1408498), 2021-01-15
Supplement: f1 [file 1408498.f1.doc]

**Supplementary Materials**

**Appendix Derivation of Elements in Fisher Information Matrix and CRB matrix**

In this appendix, the expressions of major elements in Fisher Information Matrix and CRB matrix are derived.

The derivation of (21) in [1] goes first.

Note that the received data satisfies . Let , According to the Appendix 3C in the Chapter III of [2], there are

It should be noted that orthogonal waveforms are transmitted from MIMO radar with planar arrays, whose waveform covariance matrix can be expressed as

Let , and note that

For the first term on the diagonal of Fisher Information Matrix,

The steering vectors and satisfy the following connections

Consider , there are

For the first term and the fourth term in (6), there are

For the second term there are

For the third term there are

Therefore

and

Therefore

is irrelevant with the configuration of virtual array.

In the same way, there are

and

The derivation of (46) in [1] is provided as follows.

The connection between CRB matrix and Fisher Information Matrix can be expressed as

Note that the dimension of Fisher Information Matrix in this paper is , which means that the CRB matrix can be denoted as

Consider the first term on the diagonal, there is

Taking in (11), (13) and (14), there is

Consider the second term on the diagonal, there is

Taking in (11), (13) and (14), there is

## References

[1] X. Li, B. Wang. “Thinned Virtual Array for Cramer Rao Bound Optimization in MIMO Radar,” *International Journal of Antenna and Propagation*, Hindawi Publishing House, submitted, pp.1-21

[2] S. Kay, “Cramer-Rao Lower Bound,” *Fundamentals of statisticalsignal processing*, Prentice Hall, 1993, pp.27-81
